# Supplementary material for: Archaeological expansions in tropical South America during the late Holocene: Assessing the role of demic diffusion
Source: PubMed Central journal article supplement (PMC7185720; doi:10.1371/journal.pone.0232367), 2020-04-27
Supplement: pone.0232367.s021.pdf [file pone.0232367.s021.pdf]

```

75         self.value = aux
76
77
78 # catchment
79 class Gen_03:
80     def initialize(self):
81         self.value = np.random.choice((1, 2, 3), 1)[0]
82     def mutation(self):
83         if self.value == 2:
84             self.value += np.random.choice((-1, 1), 1)[0]
85         else:
86             self.value = 2
87
88
89 # leapfrogging
90 class Gen_04:
91     def initialize(self):
92         if 0.5 > np.random.uniform(0, 1, 1)[0]: # 50% prob to set 0
93             self.value = 0
94         else:
95             self.value = int(np.random.uniform(15, 25, 1)[0])
96     def mutation(self):
97         if 0.25 > np.random.uniform(0, 1, 1)[0]: # 25% prob to set 0
98             self.value = 0
99         else:
100            if self.value == 0:
101                self.value = 15
102            else:
103                if 15 < self.value < 25:
104                    aux = self.value + (int(np.random.uniform(-10, 10, 1)[0]) or
105                                         np.random.choice((-1, 1)))
106                    # If value is already minimum, can only increase;
107                    # if maximum, can only decrease.
108                elif self.value == 15:
109                    aux = self.value + int(np.random.uniform(1, 10, 1)[0])
110                elif self.value == 25:
111                    aux = self.value - int(np.random.uniform(1, 10, 1)[0])
112
113                if aux > 25:
114                    self.value = 25
115                elif aux < 15:
116                    self.value = 15
117                else:
118                    self.value = aux
119
120
121 # permanence
122 class Gen_05:
123     def initialize(self):
124         self.value = int(np.random.uniform(10, 30, 1)[0])
125     def mutation(self):
126         if 10 < self.value < 30:
127             aux = self.value + (int(np.random.uniform(-10, 10, 1)[0]) or
128                                 np.random.choice((-1, 1)))
129             # If value is already minimum, can only increase;
130             # if maximum, can only decrease.
131         elif self.value == 10:
132             aux = self.value + int(np.random.uniform(1, 10, 1)[0])
133         elif self.value == 30:
134             aux = self.value - int(np.random.uniform(1, 10, 1)[0])
135
136         if aux > 30:
137             self.value = 30
138         elif aux < 10:
139             self.value = 10
140         else:
141             self.value = aux
142
143
144 # genome object
145 class Genome:
146     def __init__(self, genes):
147         self.genes = genes
148         self.fitness = 'OFF'

```

```

149 def initialize(self):
150     self.genes = [Gen_01(), Gen_02(), Gen_03(), Gen_04(), Gen_05()]
151     for i in self.genes:
152         i.initialize()
153 def mutation(self, prob):
154     if prob > np.random.uniform(0, 1, 1)[0]:
155         mpoint = np.random.choice(range(0, len(self.genes)), 1)[0]
156         self.genes[mpoint].mutation()
157         self.fitness = 'OFF'
158 def genes_values(self):
159     return [i.value for i in self.genes]
160
161
162 # algorithm object
163 class GA:
164     def __init__(self, n_pop, n_select, n_elit, prob_cross, prob_mut, max_it):
165         # algorithm parameters
166         self.n_pop = n_pop
167         self.n_select = n_select
168         self.n_elit = n_elit
169         self.prob_cross = prob_cross
170         self.prob_mut = prob_mut
171         self.max_it = max_it
172
173 # initialize
174 def initialize(self):
175     self.population = [Genome(0) for i in range(self.n_pop)]
176     for i in self.population:
177         i.initialize()
178
179 # compute fitness
180 def get_fitness(self):
181     pop_subset = [p for p in self.population if isinstance(p.fitness, str)]
182     pop_genes = [i.genes_values() for i in pop_subset]
183     pool = mp.Pool(10) # n cores
184     fitness = np.array(pool.map(run_model, pop_genes))
185     pool.close()
186     for i in range(len(pop_subset)):
187         pop_subset[i].fitness = fitness[i]
188     return np.array([p.fitness for p in self.population])
189
190 # best individuals
191 def get_parents(self, fitness):
192     parents = [self.population[i] for i in np.argsort(-fitness)[range(self.n_select)]]
193     return parents
194
195 # crossover
196 def do_crossover(self, parents):
197     crossovers = []
198     ind1 = 0
199     ind2 = 1
200     while len(crossovers) < self.n_pop:
201         parent1 = parents[ind1]
202         parent2 = parents[ind2]
203         if self.prob_cross > np.random.uniform(0, 1, 1)[0]:
204             pt = np.random.choice(range(1, len(parent1.genes)), 1)[0]
205             child1 = Genome(parent1.genes[0:pt] + parent2.genes[pt:len(parent2.genes)])
206             child2 = Genome(parent2.genes[0:pt] + parent1.genes[pt:len(parent1.genes)])
207             crossovers.append(cp.deepcopy(child1)) # deepcopy
208             crossovers.append(cp.deepcopy(child2)) # deepcopy
209         else:
210             crossovers.append(cp.deepcopy(parent1)) # deepcopy
211             crossovers.append(cp.deepcopy(parent2)) # deepcopy
212         ind1 = int(np.where(ind1 != len(parents)-1, ind1 + 1, 0))
213         ind2 = int(np.where(ind2 != len(parents)-1, ind2 + 1, 0))
214     return crossovers
215
216 # mutation and set new population
217 def do_mutation(self, crossovers):
218     for i in crossovers:
219         i.mutation(self.prob_mut)
220     return crossovers
221
222 # evolve loop

```

```

223     def evolve(self):
224         FILE = open('GA.pyData', 'wb')
225         for it in range(self.max_it):
226             fitness = self.get_fitness()
227             parents = self.get_parents(fitness)
228             crossovers = self.do_crossover(parents)
229             mutated = self.do_mutation(crossovers)
230             self.population = mutated + cp.deepcopy([parents[i] for i in
231                                                     range(self.n_elit)])
232
233             if it % 10 == 0:
234                 print('\n it: ' + str(it + 1) + ' writing ...\n')
235                 pickle.dump(self, FILE)
236                 FILE.close()
237                 print('\n===== Iteration: ' + str(it + 1) + ' =====\n')
238                 for i in parents[0:5]:
239                     i.Print()
240
241     def main():
242         my_ga = GA(100, 40, 5, 0.8, 0.2, 21)
243         my_ga.initialize()
244         my_ga.evolve()
245
246     if __name__ == "__main__":
247         main()

```
